# Supplementary material
Source: MDPI journal article supplement (https://www.mdpi.com/2304-6732/11/5/446)
Supplement: s1 [file s1 › photonics-2996895-supplementary.pdf]

## Supplementary Materials

The following supporting information can be downloaded at <https://www.mdpi.com/article/>, Figure S1: The refractive indexes for (a) SiN, (b) MgF<sub>2</sub>, (c) crystal Si and (d) glass substrate. Figure S2 The transmission spectra dependence of edge filter on (a) and (b), longitudinal distances,  $H_1$  and  $H_2$ , between two adjacent SiNSs MFLs.

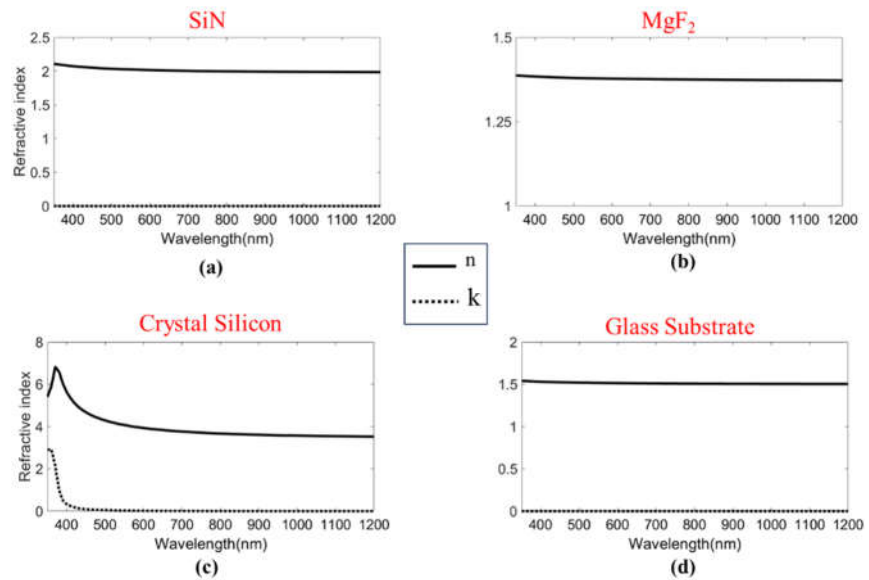

Figure S1: The refractive indexes for (a) SiN, (b) MgF<sub>2</sub>, (c) crystal Si and (d) glass substrate.

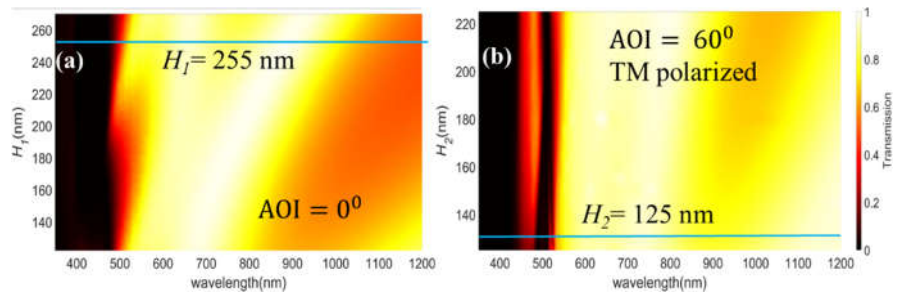

Figure S2 The transmission spectra dependence of edge filter on (a) and (b), longitudinal distances,  $H_1$  and  $H_2$ , between two adjacent SiNSs MFLs.
